# Supplementary material for: Monitoring Virgin Olive Oil Shelf-Life by Fluorescence Spectroscopy and Sensory Characteristics: A Multidimensional Study Carried Out under Simulated Market Conditions
Source: Foods. 2020 Dec 11;9(12):1846. doi: 10.3390/foods9121846 (PMC7763516; doi:10.3390/foods9121846)
Supplement: Supplementary file 1 [file foods-09-01846-s001.pdf]

*Supplementary Material*

**Monitoring virgin olive oil shelf-life by fluorescence spectroscopy and sensory characteristics. A multidimensional study carried out under simulated market conditions.**

**Ana Lobo-Prieto<sup>a</sup>, Noelia Tena<sup>b</sup>, Ramon Aparicio-Ruiz<sup>b</sup>, Diego L. García-González<sup>a\*</sup>, Ewa Sikorska<sup>c</sup>.**

<sup>a</sup>Instituto de la Grasa (CSIC), Campus Universidad Pablo de Olavide – Edificio 46, Ctra. de Utrera, Km. 1, 41013 Sevilla, Spain.

<sup>b</sup>Department of Analytical Chemistry, Universidad de Sevilla, Prof. García González 2, 41012 Sevilla, Spain.

<sup>c</sup>Institute of Quality Science, The Poznan University of Economics and Business, al. Niepodleglosci 10, 61-875 Poznań, Poland.

**Table S1.** Sensory assessment results (medians of the fruity attribute and defect) during the storage experiment for each VOO.

| Months of storage | Median of the fruity attribute ( $M_f$ ) |      |      |      | Median of defect ( $M_d$ ) |      |      |      |
|-------------------|------------------------------------------|------|------|------|----------------------------|------|------|------|
|                   | VOO1                                     | VOO2 | VOO3 | VOO4 | VOO1                       | VOO2 | VOO3 | VOO4 |
| 0                 | 4.7                                      | 3.5  | 3.8  | 3.0  | 0.0                        | 0.0  | 0.0  | 2.0  |
| 1                 | 4.7                                      | 3.5  | 3.8  | 3.0  | 0.0                        | 0.0  | 0.0  | 2.0  |
| 2                 | 4.7                                      | 3.0  | 3.8  | 3.0  | 0.0                        | 0.0  | 0.0  | 2.0  |
| 3                 | 4.5                                      | 2.5  | 3.8  | 3.0  | 0.0                        | 0.0  | 0.0  | 2.0  |
| 4                 | 4.0                                      | 2.0  | 3.8  | 3.0  | 0.0                        | 0.0  | 0.0  | 2.0  |
| 5                 | 4.0                                      | 2.0  | 3.8  | 3.0  | 0.0                        | 1.0  | 0.0  | 2.0  |
| 6                 | 4.0                                      | 1.9  | 3.8  | 3.0  | 0.0                        | 1.0  | 0.0  | 2.0  |
| 7                 | 3.8                                      | 1.9  | 2.0  | 3.0  | 0.0                        | 1.9  | 0.0  | 2.0  |
| 8                 | 3.8                                      | 1.9  | 2.0  | 3.0  | 0.0                        | 1.9  | 0.0  | 2.0  |
| 9                 | 3.8                                      | 1.8  | 2.0  | 2.8  | 0.0                        | 1.9  | 2.6  | 2.0  |
| 10                | 3.6                                      | 1.5  | 2.0  | 2.8  | 0.0                        | 2.0  | 2.5  | 2.0  |
| 11                | 3.6                                      | 1.5  | 2.0  | 2.8  | 0.0                        | 2.0  | 2.5  | 2.0  |
| 12                | 3.1                                      | 1.5  | 2.0  | 2.8  | 0.0                        | 2.0  | 2.5  | 2.0  |
| 13                | 3.1                                      | 1.5  | 2.0  | 2.8  | 0.0                        | 2.0  | 2.5  | 2.0  |
| 14                | 3.0                                      | 1.5  | 1.8  | 2.8  | 0.0                        | 2.0  | 2.0  | 2.0  |
| 15                | 2.0                                      | 1.5  | 1.8  | 2.8  | 2.5                        | 2.0  | 2.0  | 2.0  |
| 16                | 2.0                                      | 1.5  | 1.8  | 2.5  | 2.5                        | 2.0  | 2.0  | 2.0  |
| 17                | 1.8                                      | 1.5  | 1.8  | 2.5  | 2.5                        | 2.0  | 2.0  | 2.0  |
| 18                | 1.6                                      | 1.5  | 1.8  | 2.0  | 2.9                        | 2.0  | 2.0  | 3.5  |
| 19                | 1.6                                      | 1.5  | 1.8  | 0.0  | 3.0                        | 2.0  | 2.0  | 3.5  |
| 20                | 1.6                                      | 1.5  | 1.8  | 0.0  | 3.0                        | 2.0  | 2.0  | 3.5  |
| 21                | 1.5                                      | 1.5  | 1.8  | 0.0  | 3.0                        | 2.0  | 2.0  | 4.0  |

*Note: According to European commission regulation (see [15] in the main publication): Extra virgin olive oil,  $M_f > 0$  and  $M_d = 0$ ; Virgin olive oil,  $M_f > 0$  and  $M_d \leq 3.5$ ; Lampante olive oil,  $M_d > 3.5$ .*

**Table S2.** Phenolic compounds identified in the VOO samples subjected to storage at moderate conditions. The compounds are grouped according to the excitation wavelength chromatogram where they were registered.

| Compound                                                                                         | Code |
|--------------------------------------------------------------------------------------------------|------|
| Identified at $\lambda_{\text{ex}} = 280 \text{ nm}$                                             |      |
| Hydroxytyrosol                                                                                   | 1    |
| Tyrosol                                                                                          | 2    |
| <i>p</i> -hydroxyphenylacetic acid (internal standard)                                           | 3    |
| Vanillic acid                                                                                    | 4    |
| Vanillin                                                                                         | 5    |
| <i>p</i> -coumaric acid                                                                          | 6    |
| Hydroxytyrosol acetate                                                                           | 7    |
| <i>o</i> -coumaric acid (internal standard)                                                      | 11   |
| Dialdehydic form of elenolic acid linked to hydroxytyrosol (3,4-DHPEA-EDA)                       | 12   |
| Dialdehydic form of decarboxymethyl elenolic acid linked to <i>p</i> -HPEA ( <i>p</i> -HPEA-EDA) | 14   |
| Pinoresinol                                                                                      | 15   |
| Cinamic acid                                                                                     | 16   |
| Acetoxypinoresinol                                                                               | 17   |
| Aldehydic form of elenolic acid linked to hydroxytyrosol (3,4-DHPEA-EA)                          | 20   |
| Aldehydic form of elenolic acid linked to tyrosol ( <i>p</i> -HPEA-EA)                           | 22   |
| Identified at $\lambda_{\text{ex}} = 235 \text{ nm}$                                             |      |
| Elenolic acid                                                                                    | A    |
| Identified at $\lambda_{\text{ex}} = 335 \text{ nm}$                                             |      |
| Luteolin                                                                                         | 19   |
| Apigenin                                                                                         | 21   |

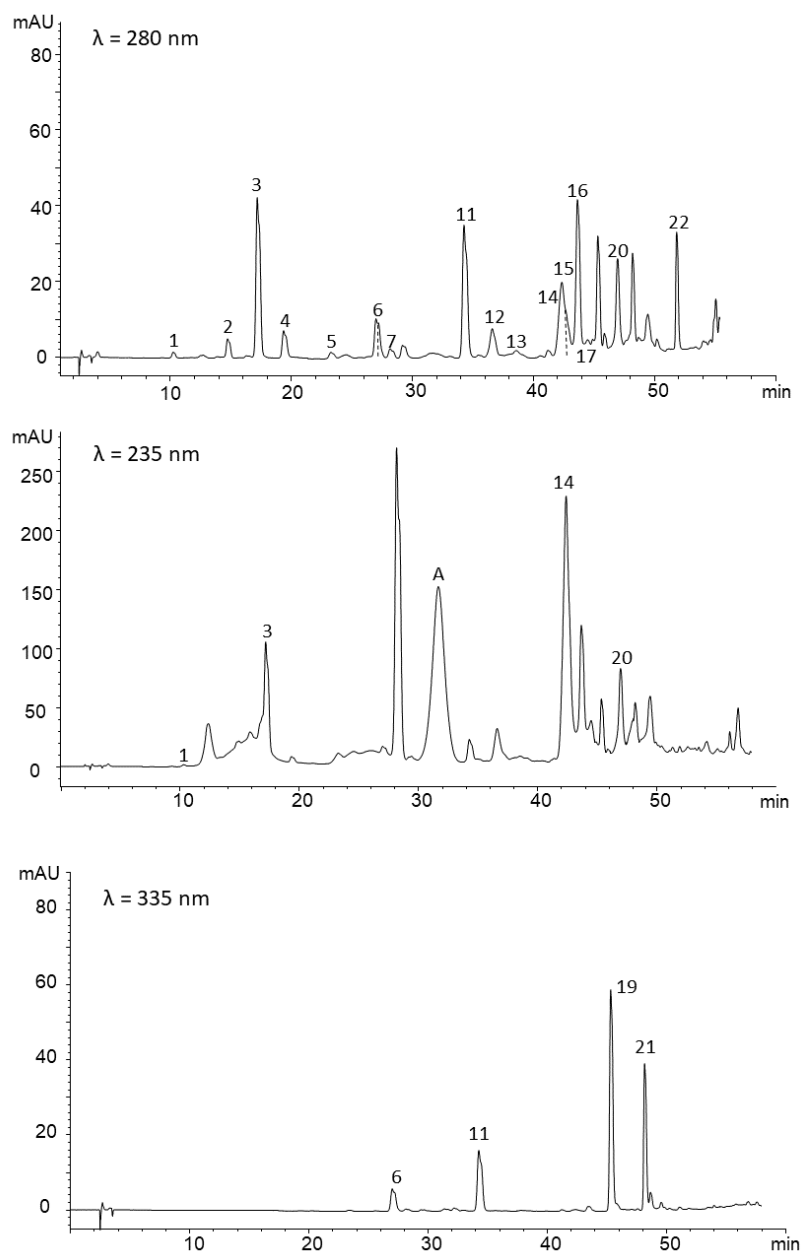

**Figure S1.** An example of chromatogram obtained from the phenol analysis. The chromatograms correspond to VOO1 (fresh oil). The codes are shown in **Table S2**.

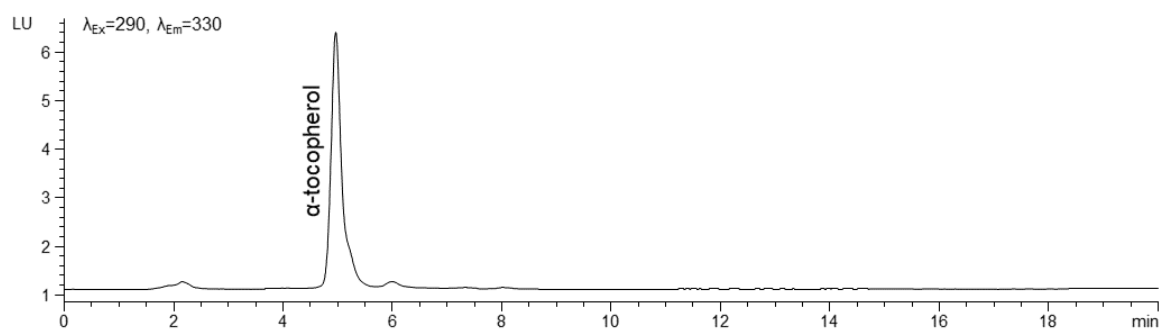

**Figure S2.** An example of chromatogram obtained from the  $\alpha$ -tocopherol analysis. The chromatogram corresponds to VOO1 (fresh oil).

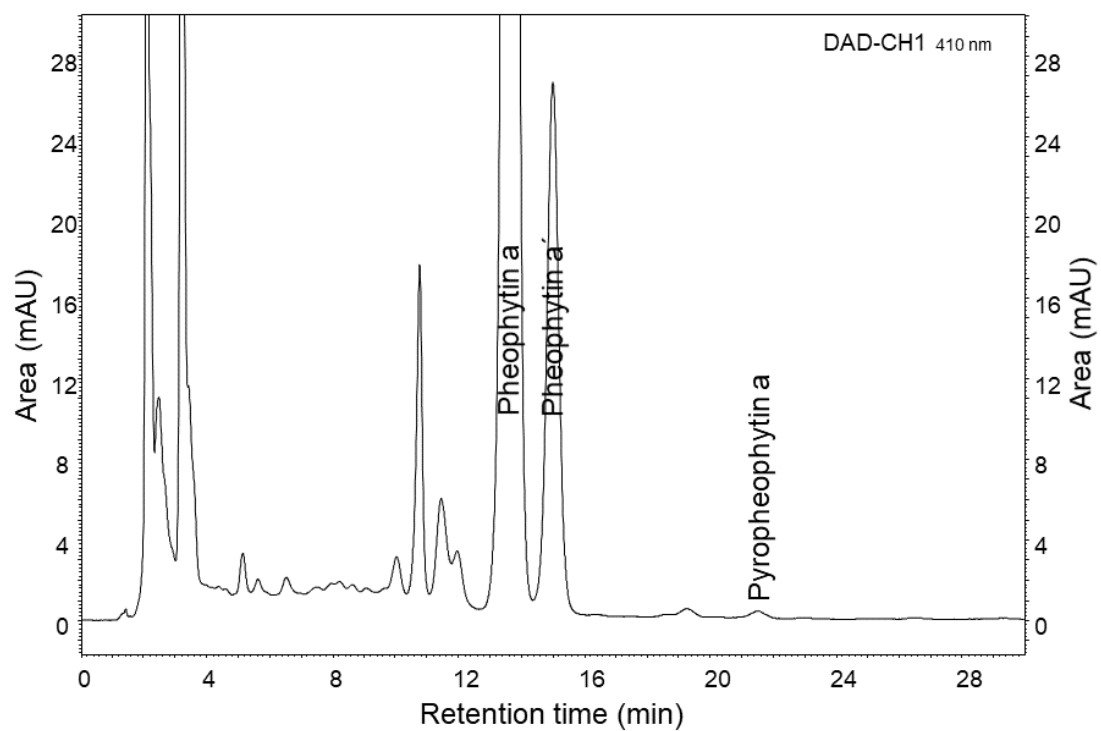

**Figure S3.** An example of chromatogram of the degradation products of chlorophyll a obtained in the analysis. The chromatogram corresponds to VOO3 (fresh oil).

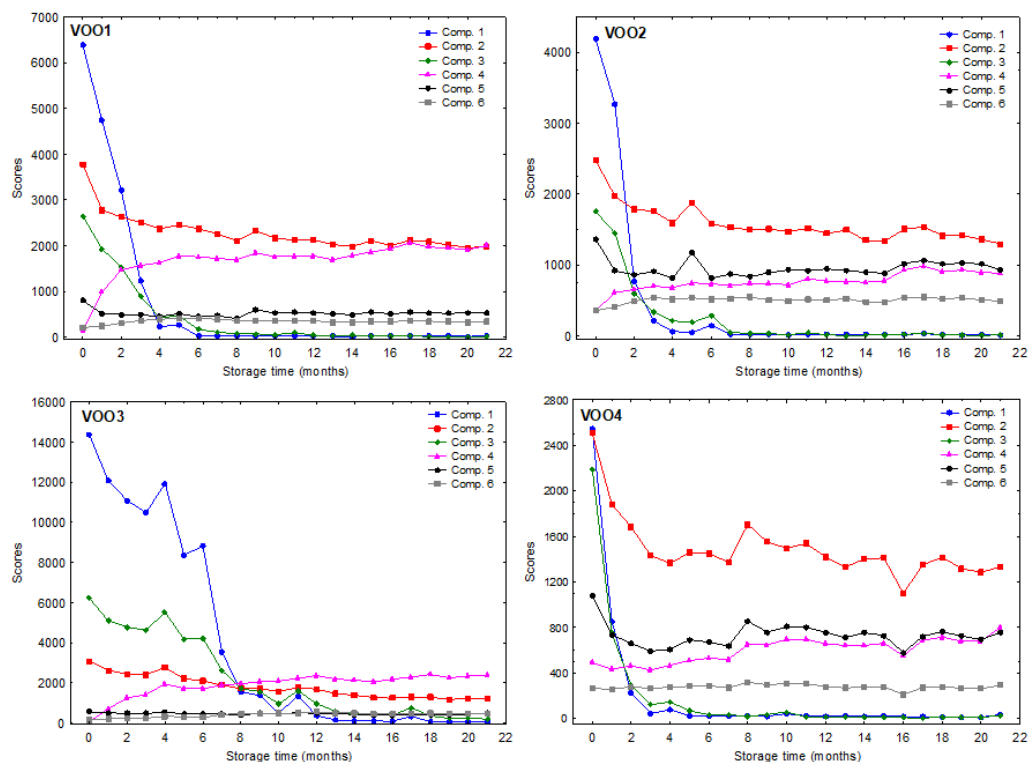

**Figure S4.** PARAFAC scores of the sample set (different monovarietal samples during the storage at moderate conditions). Component 1 ( $\lambda_{ex}/\lambda_{em}$  408/678 nm), component 2 ( $\lambda_{ex}/\lambda_{em}$  293/322 nm), component 3 ( $\lambda_{ex}/\lambda_{em}$  408/668 nm), component 4 ( $\lambda_{ex}/\lambda_{em}$  300/418 nm), component 5 ( $\lambda_{ex}/\lambda_{em}$  280/314 nm), and component 6 ( $\lambda_{ex}/\lambda_{em}$  340/450 nm).
